# Supplementary material for: Joint action goals reduce visuomotor interference effects from a partner’s incongruent actions
Source: PubMed Central journal article supplement (PMC6817939; doi:10.1038/s41598-019-52124-6), 2019-10-28
Supplement: 41598_2019_52124_MOESM1_ESM.pdf [file 41598_2019_52124_MOESM1_ESM.pdf]

**Joint action goals reduce visuomotor interference effects from a partner's incongruent actions (Appendix/Supplementary Data)**

Sam Clarke <sup>a1</sup>, Luke McEllin <sup>b</sup>, Anna Francová <sup>b</sup>, Marcell Székely <sup>b</sup>, Stephen A. Butterfill <sup>c</sup>,  
and John Michael <sup>bc</sup>

<sup>a</sup> Department of Philosophy, York University  
S900 Ross Building, 4700 Keele Street, Toronto, Ontario, M3J 1P3, Canada

<sup>b</sup> Department of Cognitive Science, Central European University  
Október 6. u. 7, Budapest 1051, Hungary

<sup>c</sup> Department of Philosophy, The University of Warwick  
University of Warwick, Coventry, CV4 7AL, UK

**RTs**

| <b>Group</b> | <b>Trial</b> | <b>Congruence</b> | <b>Mean</b> | <b>SD</b> | <b>N</b> |
|--------------|--------------|-------------------|-------------|-----------|----------|
| Joint First  | Individual   | Congruent         | 1092        | 179       | 36       |
|              |              | Incongruent       | 1128        | 171       | 36       |
|              | Joint        | Congruent         | 1068        | 183       | 36       |
|              |              | Incongruent       | 1137        | 171       | 36       |
| Joint Last   | Individual   | Congruent         | 1149        | 165       | 36       |
|              |              | Incongruent       | 1252        | 175       | 36       |
|              | Joint        | Congruent         | 1133        | 155       | 36       |
|              |              | Incongruent       | 1176        | 134       | 36       |

Table 1: Mean and Standard Deviation of the reaction times for each of the experimental conditions

<sup>1</sup> [spclarke@yorku.ca](mailto:spclarke@yorku.ca)

### Accuracy

| Group       | Trial      | Compatibility | Mean | SD   | N  |
|-------------|------------|---------------|------|------|----|
| Joint First | Individual | Congruent     | .959 | .034 | 36 |
|             |            | Incongruent   | .964 | .036 | 36 |
|             | Joint      | Congruent     | .936 | .062 | 36 |
|             |            | Incongruent   | .933 | .068 | 36 |
| Joint Last  | Individual | Congruent     | .955 | .042 | 36 |
|             |            | Incongruent   | .947 | .055 | 36 |
|             | Joint      | Congruent     | .967 | .036 | 36 |
|             |            | Incongruent   | .950 | .046 | 36 |

Table 2: Mean and Standard Deviation of the accuracy ratio (proportion of correct responses) for each of the experimental conditions
